# Supplementary material for: LED Light-Induced ROS Differentially Regulates Focal Adhesion Kinase Activity in HaCaT Cell Viability
Source: MDPI journal article supplement (doi:10.3390/cimb44030082), 2022-03-04
Supplement: s1 [file s1]

## **Supplemental Information**

**Title: LED lights-induced ROS differentially regulates focal adhesion kinase activity in HaCaT cell viability**

### **Author's name:**

Jun-Sub Kim<sup>1</sup>, and Ssang-Taek Steve Lim<sup>2</sup>

### **Affiliation:**

1. Department of Biotechnology, Korea National Transportation University, Chungbuk, Korea
2. Department of Biochemistry and Molecular Biology, University of South Alabama, College of Medicine, Mobile, AL 36688

Correspondence should be addressed to Jun-Sub Kim; [junskim@ut.ac.kr](mailto:junskim@ut.ac.kr) and Ssang-Taek Steve Lim; [stlim@southalabama.edu](mailto:stlim@southalabama.edu)

**Running Title: LED lights regulate FAK activity**

**Supplemental Table S1. Illuminance provided under various conditions (from Wikipedia, Lux)**

| Illuminance (lux) | Surfaces Illuminated by                        |
|-------------------|------------------------------------------------|
| 0.0001            | Moonless, overcast night sky (starlight)       |
| 0.002             | Moonless clear night sky with airglow          |
| 0.05–0.3          | Full moon on a clear night                     |
| 3.4               | Dark limit of civil twilight under a clear sky |
| 20–50             | Public areas with dark surroundings            |
| 50                | Family living room lights                      |
| 80                | Office building hallway/toilet lighting        |
| 100               | Very dark overcast day                         |
| 150               | Train station platforms                        |
| 320–500           | Office lighting                                |
| 400               | Sunrise or sunset on a clear day.              |
| 1000              | Overcast day; typical TV studio lighting       |
| 10,000–25,000     | Full daylight (not direct sun)                 |
| 32,000–100,000    | Direct sunlight                                |

Supplemental Figure legends

**Supplemental Figure S1. FAK inhibition reduces LED light-induced MAPKs activation.**

HaCaT cells in a 6-well plate were pretreated with FAK inhibitor (A) for 1 h and then were exposed to LED lights for 10 min. Shown are immunoblots of pY397 FAK, p-IKK $\alpha$ , p-JNK, p-ERK, p-p38 and GAPDH as loading control. (a-f) Fold change of pY397 FAK, p-IKK $\alpha$ , p-JNK, p-ERK, and p-p38 was calculated (n=3,  $\pm$ SD). \*\*  $p < 0.001$  vs. control. LED (Red, Green, or Blue) vs. LED (Red, Green, or Blue) + FAKi, NAC, or DPI, #  $p < 0.001$

**Supplemental Figure S2. ROS scavenger (NAC) reduces LED light-induced MAPKs activation.** HaCaT cells in a 6-well plate were pretreated with NAC (10 mM) (A) for 1 h and then were exposed to LED lights for 10 min. Shown are immunoblots of pY397 FAK, p-IKK $\alpha$ , p-JNK, p-ERK, p-p38 and GAPDH as loading control. (a-f) Fold change of pY397 FAK, p-IKK $\alpha$ , p-JNK, p-ERK, and p-p38 was calculated (n=3,  $\pm$ SD). \*\*  $p < 0.001$  vs. control. LED (Red, Green, or Blue) vs. LED (Red, Green, or Blue) + FAKi, NAC, or DPI, #  $p < 0.001$

**Supplemental Figure S3. ROS scavenger (DPI) reduces LED light-induced MAPKs activation.** HaCaT cells in a 6-well plate were pretreated with DPI (10  $\mu$ M) (A) for 1 h and then were exposed to LED lights for 10 min. Shown are immunoblots of pY397 FAK, p-IKK $\alpha$ , p-JNK, p-ERK, p-p38 and GAPDH as loading control. (a-f) Fold change of pY397 FAK, p-IKK $\alpha$ , p-JNK, p-ERK, and p-p38 was calculated (n=3,  $\pm$ SD). \*\*  $p < 0.001$  vs. control. LED (Red, Green, or Blue) vs. LED (Red, Green, or Blue) + FAKi, NAC, or DPI, #  $p < 0.001$
