# Supplementary figures and images for: LED Light-Induced ROS Differentially Regulates Focal Adhesion Kinase Activity in HaCaT Cell Viability
Source: MDPI journal article supplement (doi:10.3390/cimb44030082), 2022-03-04

**A**

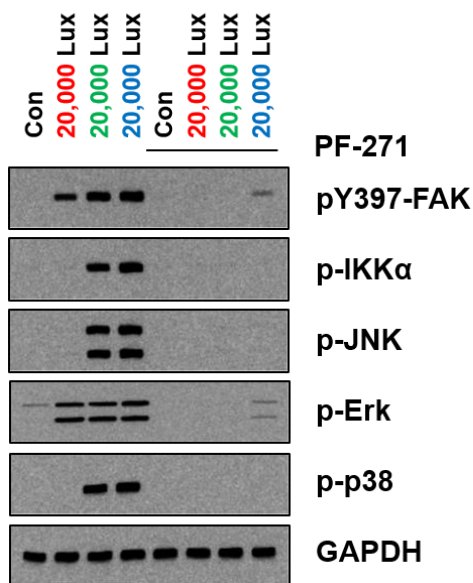

(a)

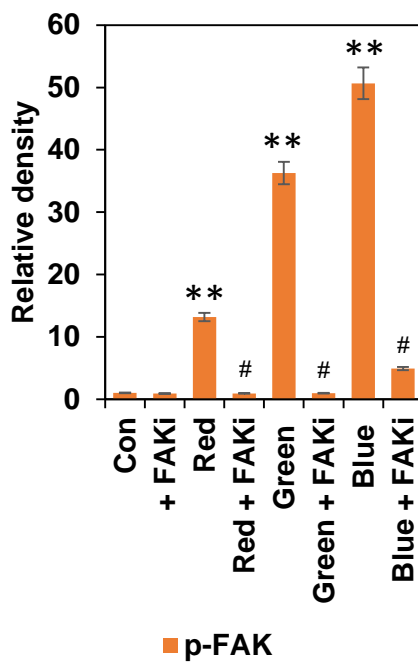

(b)

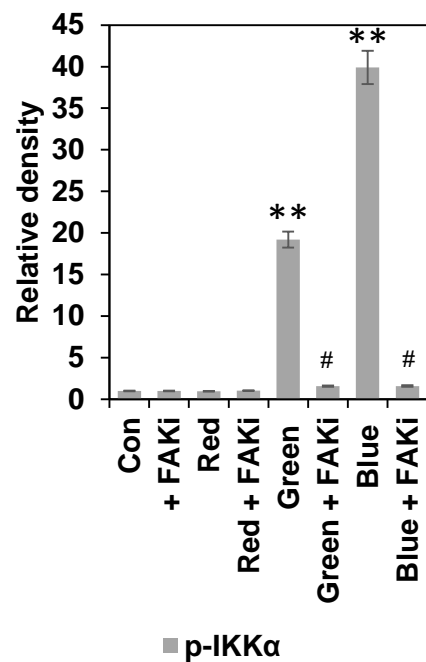

(c)

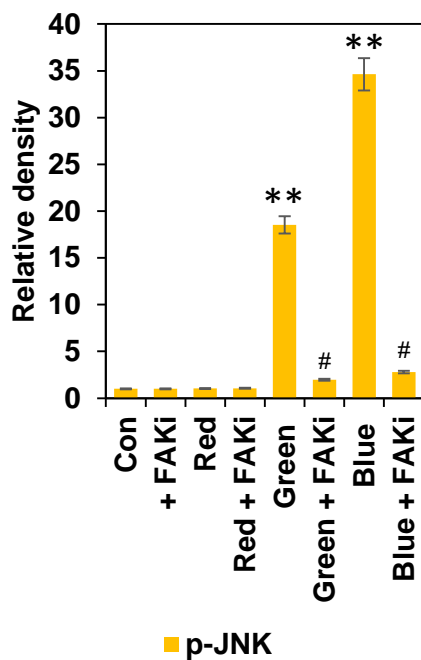

(d)

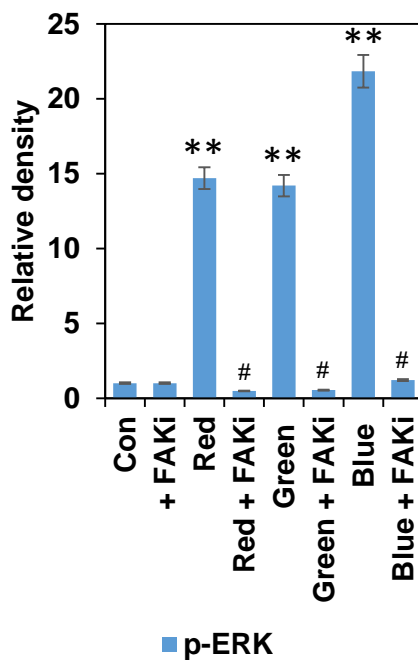

(e)

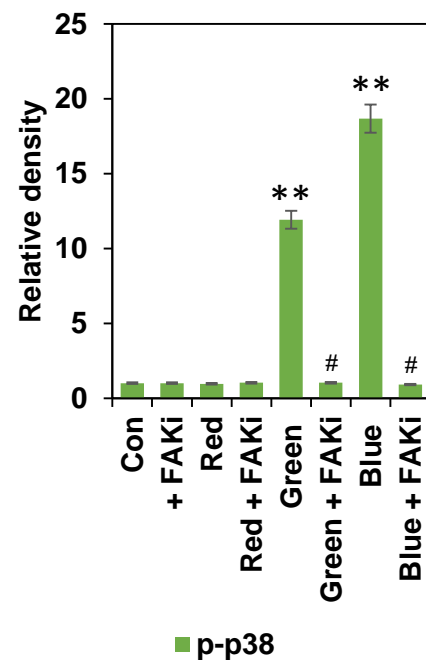

**B**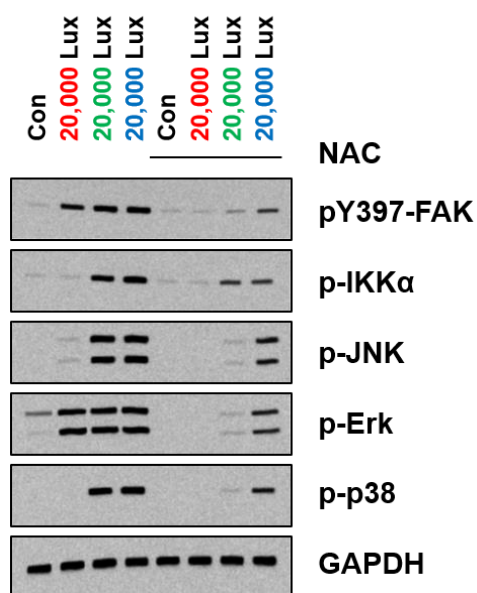**(a)**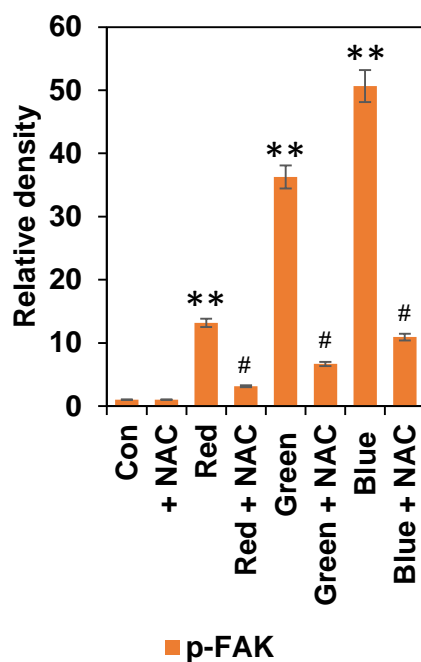**(b)**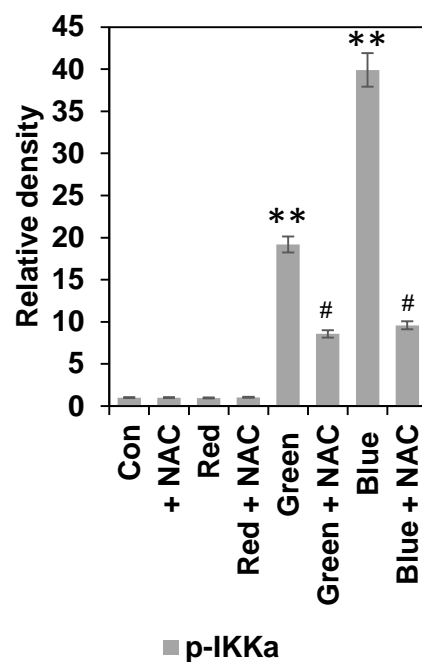**(c)**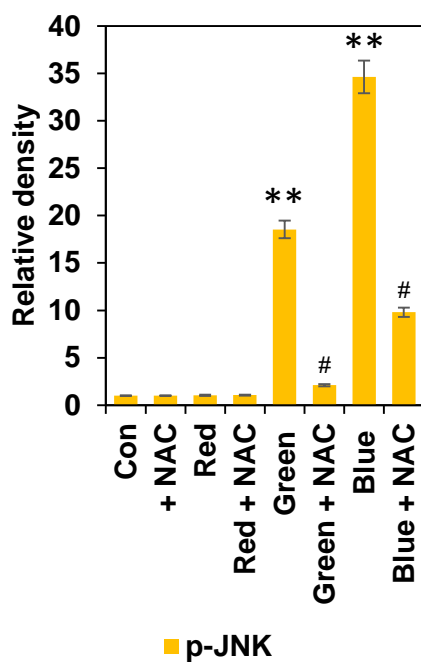**(d)**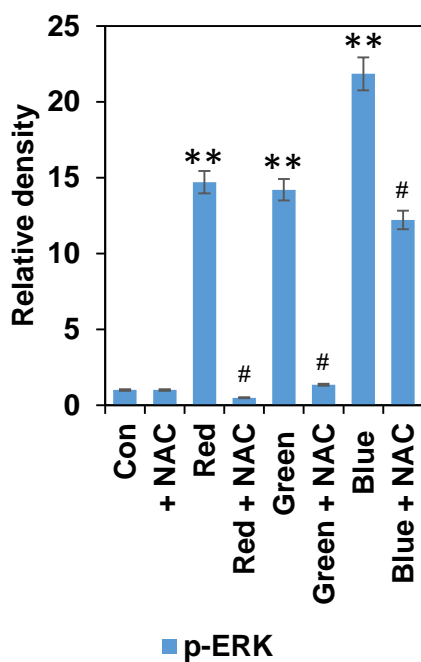**(e)**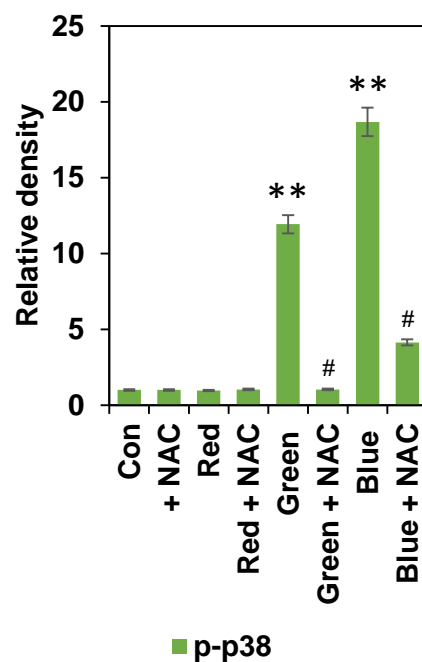

C

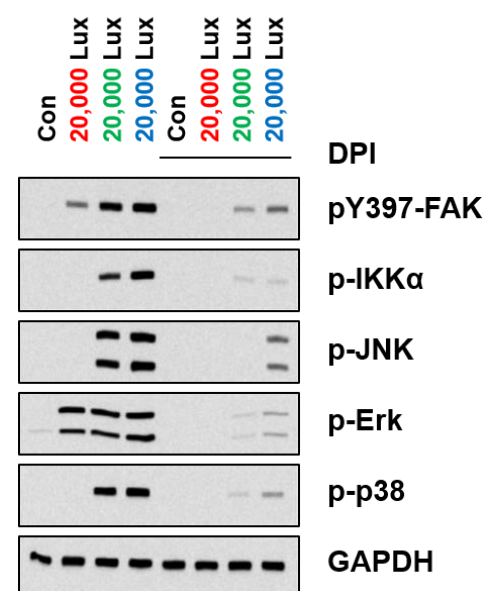

(a)

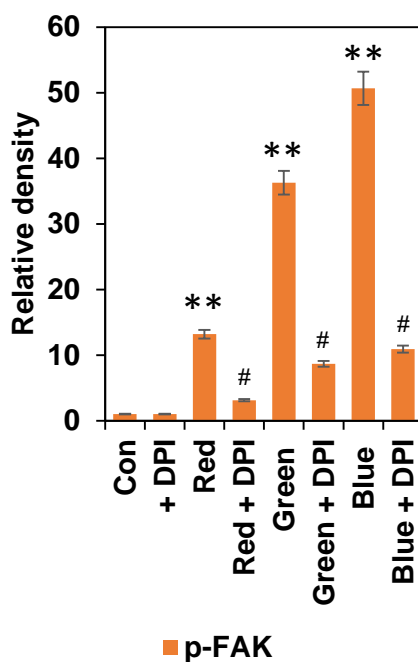

(b)

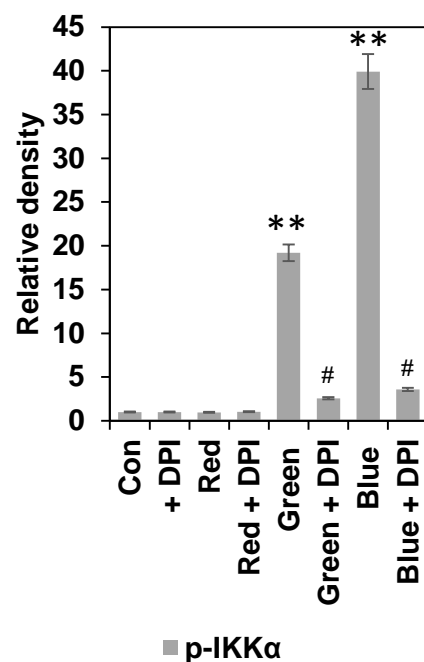

(c)

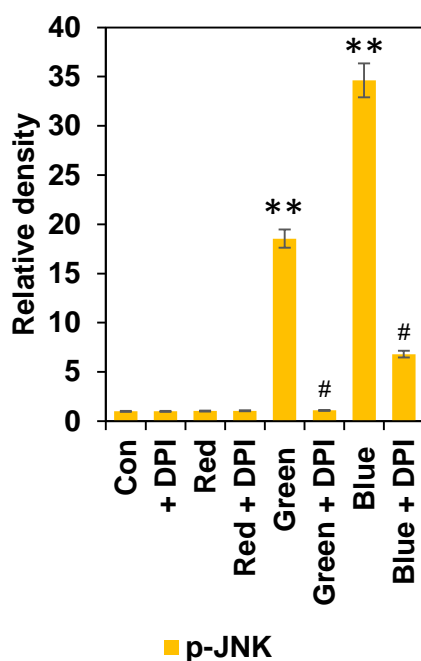

(d)

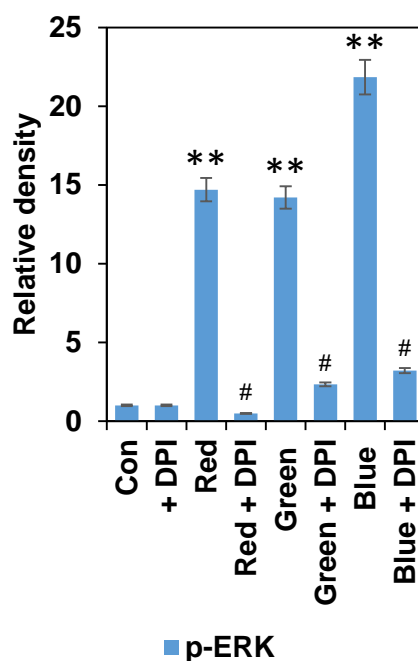

(e)

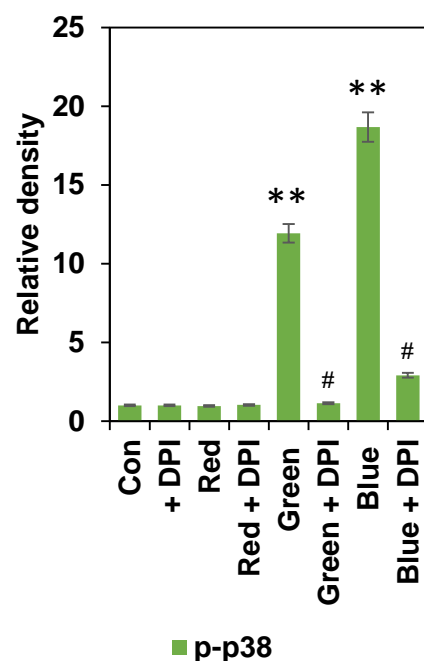

Supplemental Figure S3

Supplement: s1 [file s1]
